# Supplementary material for: CRISPR-edited human ES-derived oligodendrocyte progenitor cells improve remyelination in rodents
Source: PubMed Central journal article supplement (PMC11464782; doi:10.1038/s41467-024-52444-w), 2024-10-09
Supplement: 41467_2024_52444_MOESM1_ESM.pdf [file 41467_2024_52444_MOESM1_ESM.pdf]

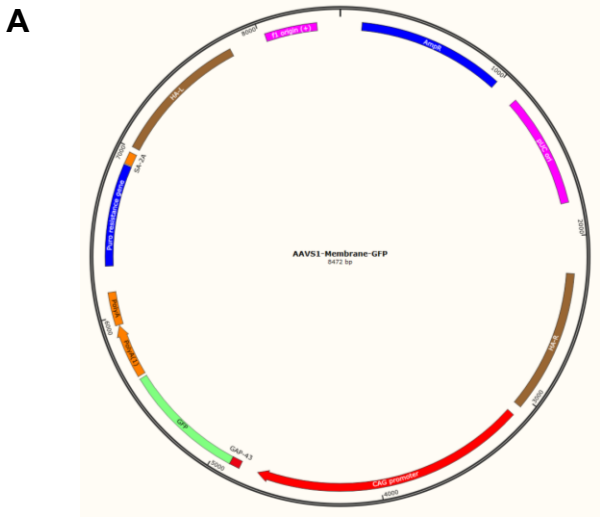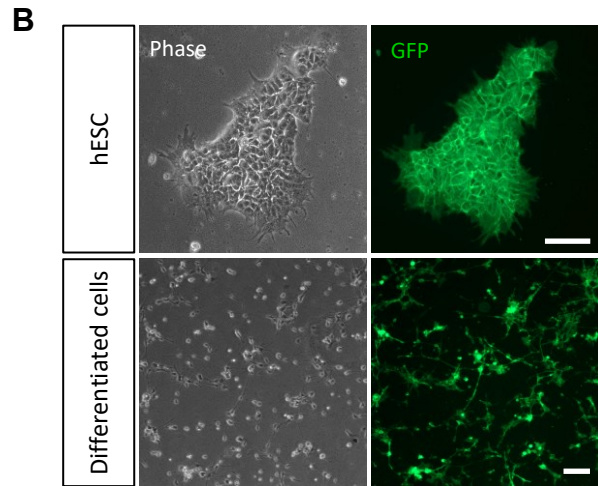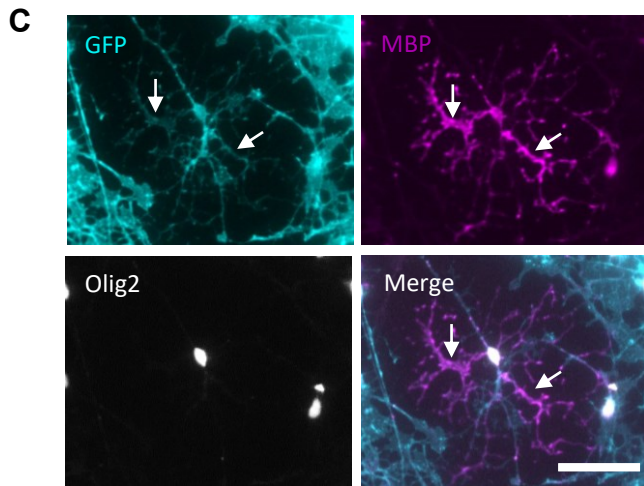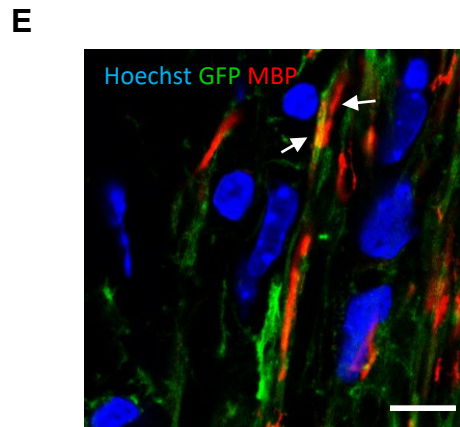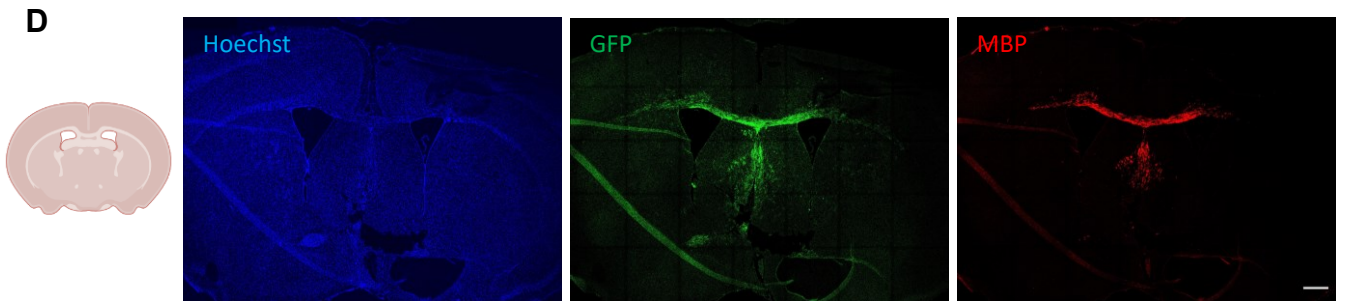

**Supplementary Figure 1 The generation of a membrane-bound GFP tagged**

**hESC line.** (A) Diagram showing plasmid map. (B) hESC express membrane-bound GFP tag which is maintained following oligodendroglial differentiation. Scale bars 50 $\mu$ m. (C) GFP+ MBP+ oligodendrocyte. MBP+ processes are GFP+, arrows. Scale bar 50 $\mu$ m. (D) GFP+ oligodendroglia were injected bilaterally into the developing corpus callosum of p2-4 *Shi/Shi:Rag2<sup>-/-</sup>* mice. Coronal sections, see diagram for orientation, taken 10 weeks following transplantation show GFP+ cells have migrated throughout the corpus callosum and generated MBP+ myelin sheaths. Scale bar 500 $\mu$ m. (E) Still image taken from Supplementary Video 1. Human GFP+ (green) oligodendrocytes generating MBP (red) (arrows) 10 weeks after transplantation into *Shi/Shi:Rag2<sup>-/-</sup>* mice. Hoechst (blue). Scale bar 10 $\mu$ m

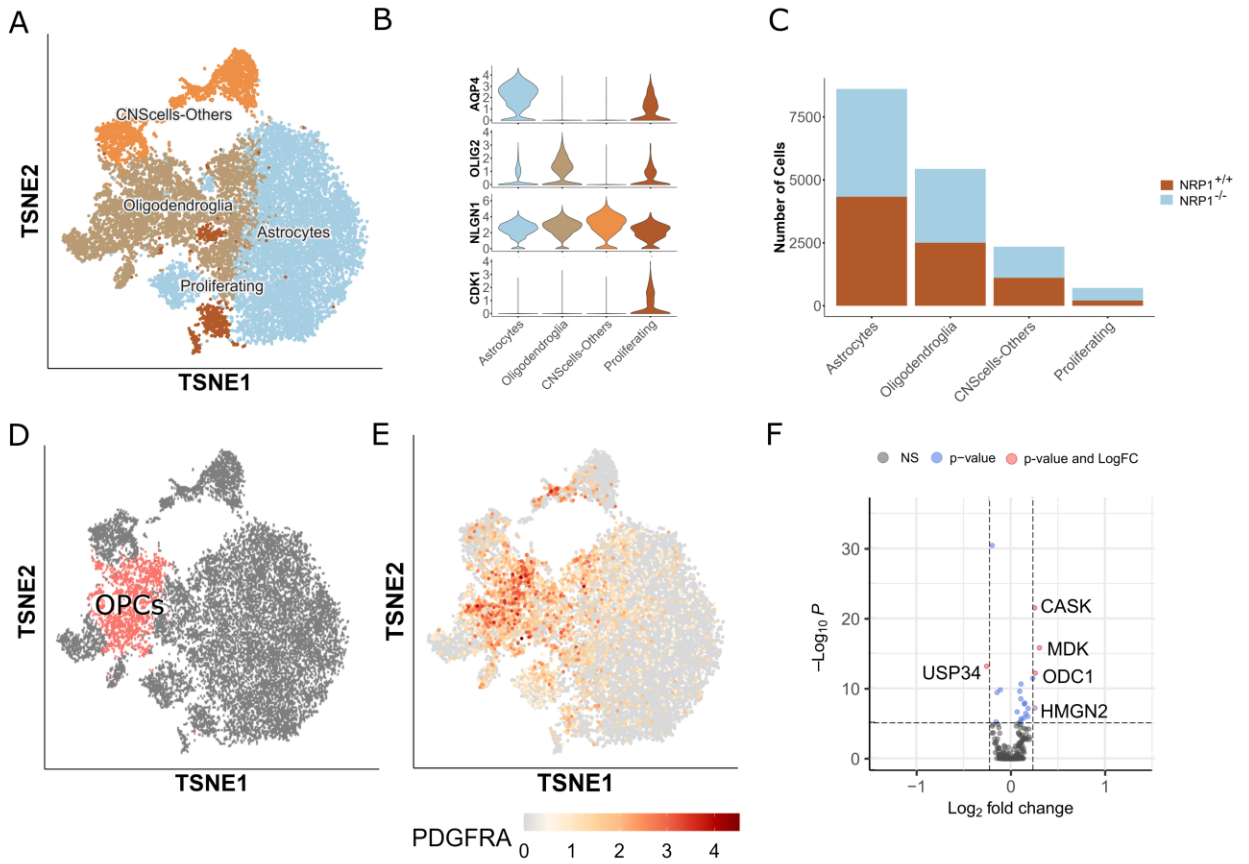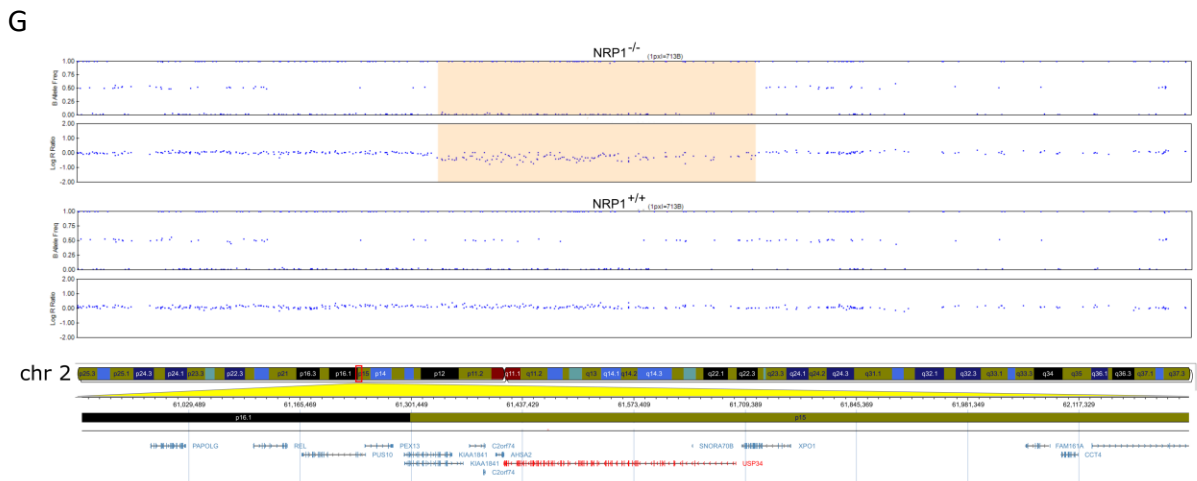

**Supplementary Figure 2 Characteristics of transplanted cells** (A-F) single-cell RNAseq bioinformatics analysis of human cells at the point of transplantation, with (A) Dimensional reduction representation (TSNE) with cells coloured according to the main cell-types detected. (B) Violin plot showing canonical genes for the different cell-types. (C) Proportions of NRP1<sup>+/+</sup> and NRP1<sup>-/-</sup> of each cell-type. (D) Cluster of OPCs used for downstream analysis, defined as the cluster with the highest expression of PDGFRA, with (E) showing a feature plot with superimposed expression of PDGFRA. (F) Volcano plot showing the differentially expressed genes between NRP1<sup>+/+</sup> and NRP1<sup>-/-</sup> OPCs. Positive values show gene transcripts upregulated in NRP1<sup>-/-</sup> cells. (G) SNP array analysis of an area of chromosome 2 which is deleted in NRP1<sup>-/-</sup> cells which incorporates the gene *USP34* and likely accounts for its lower gene expression.

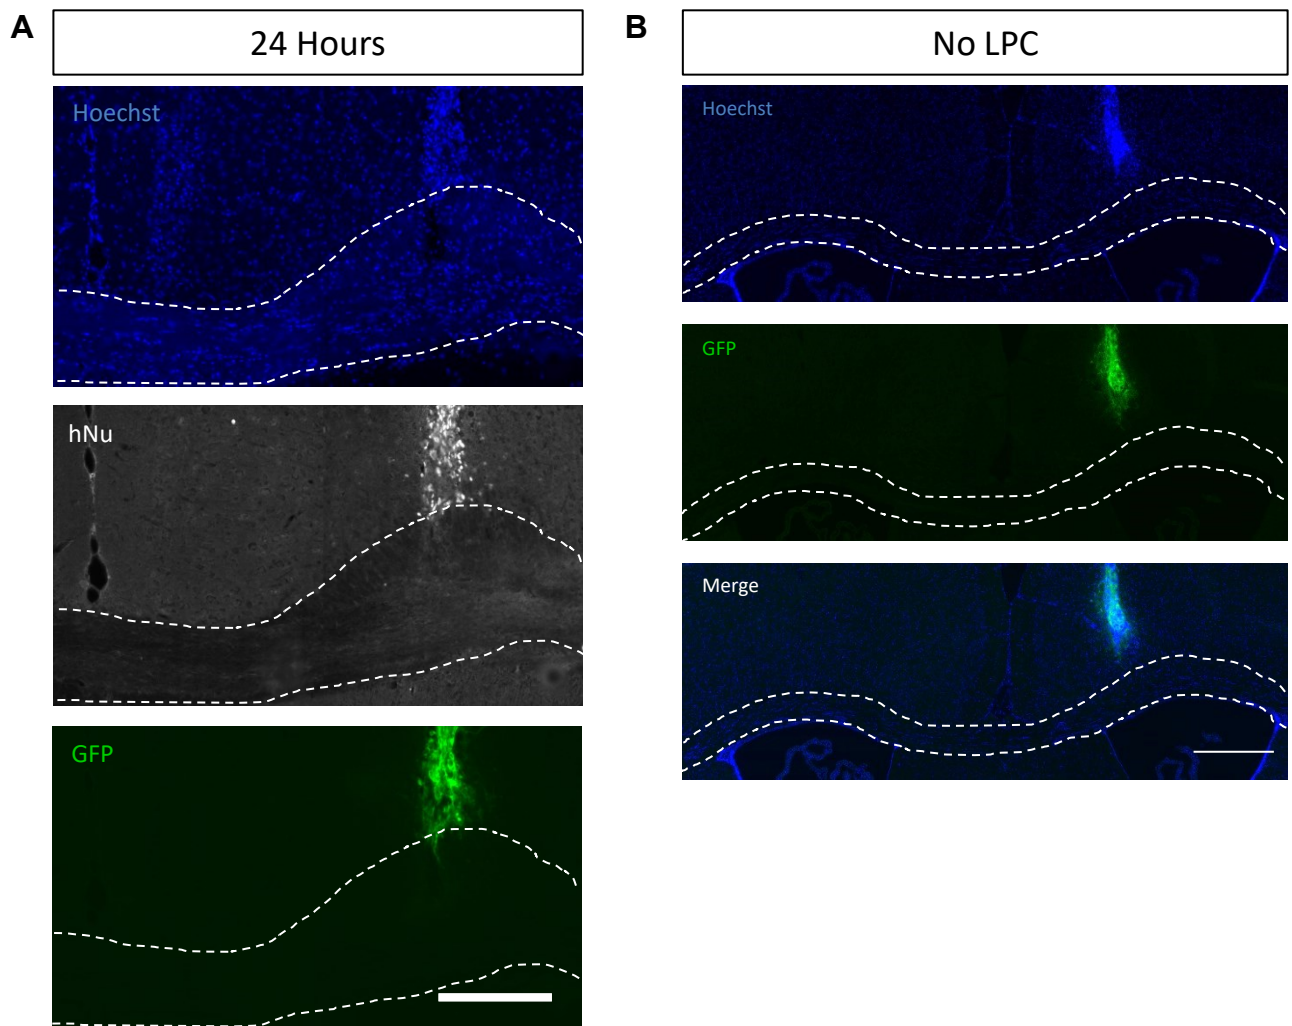

**Supplementary Figure 3. Cell movement requires a stimulus that is not the result of injection forces.** (A) 24 hours after transplant the human cells largely remain in the injection tract and do not enter the corpus callosum (highlighted between dotted lines), hNu (white), Hoechst (blue). Scale bar = 250 $\mu$ m. (B) At 1 week post transplant, when no demyelinating lesion is present, cells remained in the injection tract and did not enter the corpus callosum (highlighted between dotted lines). GFP (green), Hoechst (blue). Both from representative images of 3 mice. Scale bar = 500 $\mu$ m.

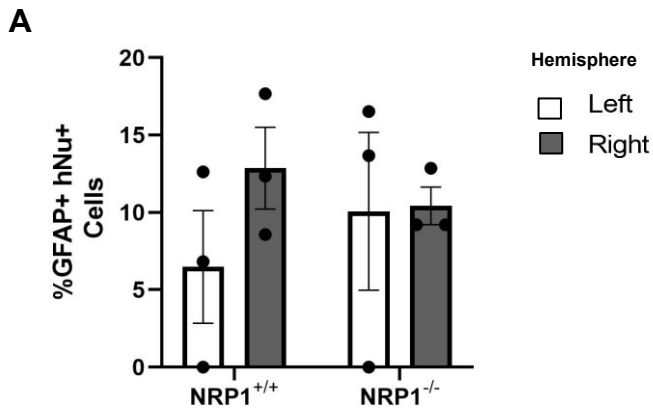

**Supplementary Figure 4: Uninjured rag 2 mice 6 weeks post transplants. NRP1<sup>+/+</sup> and NRP1<sup>-/-</sup> cells generate equal numbers of astrocytes that are evenly distributed in both hemispheres. n=3 for each condition, two-tailed unpaired t-test, p=0.2296 and p=0.5982. Each point represents 1 mouse, and is the average quantification of 3 sections/mouse. Graph plots: means  $\pm$  SEM.**

**A**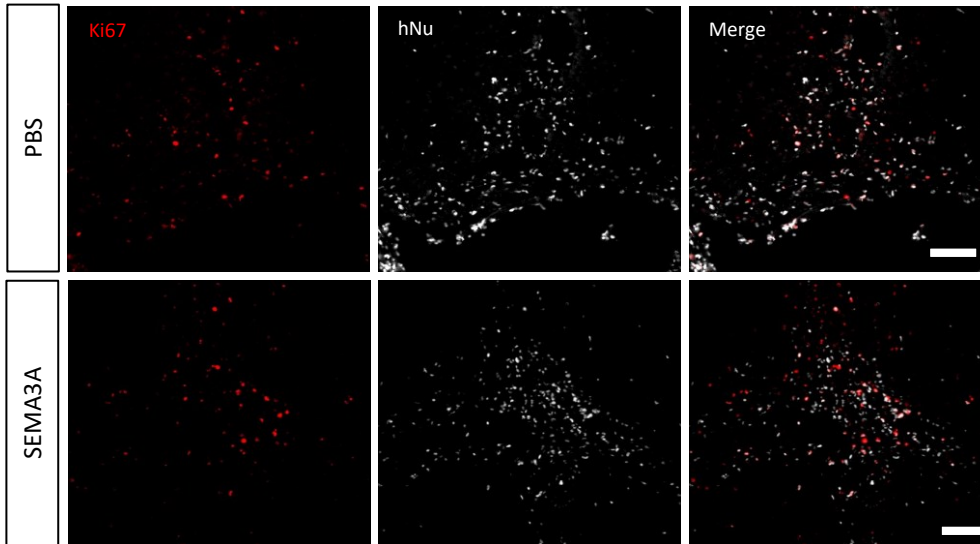**B**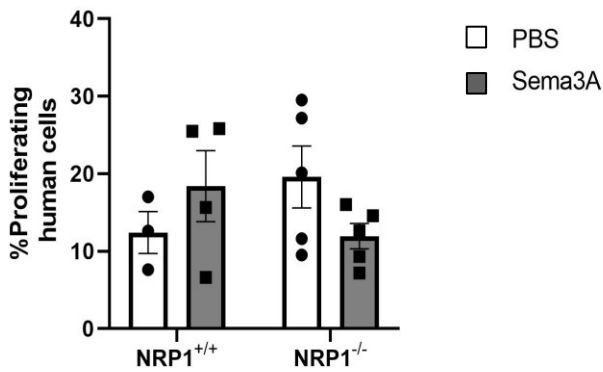

**Supplementary Figure 5: NRP1<sup>+/+</sup> and NRP1<sup>-/-</sup> human cell proliferation in the lesion is not affected by SEMA3A.** (A) Representative images of Ki67 (red) and human nuclear marker (hNu, white) immunofluorescent staining at the lesion site of PBS or SEMA3A-loaded lesions. Here, showing NRP1<sup>-/-</sup> cells. Scale bars = 100µm. (B) The percentage of proliferating human cells determined by the number of Ki67+hNu+ human nuclei. No significant difference in proliferation was observed between cell genotypes ( $p=0.3518$  and  $p=0.3656$ ) or condition ( $p=0.5036$  and  $p=0.2193$ ). Two-way ANOVA with Sidak's test. NRP1<sup>+/+</sup> n=3 (PBS) n=4 (SEMA3A), NRP1<sup>-/-</sup> n=5 both. Each point represents 1 mouse and is the average quantification of 3 sections/mouse. Graph plots: means ± SEM.

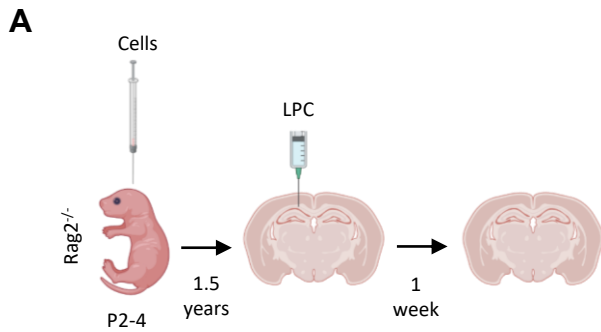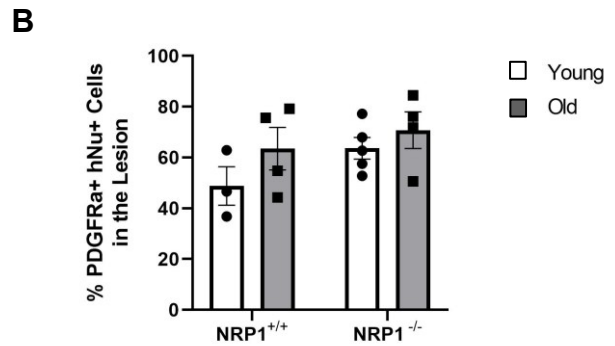

**Supplementary Figure 6: Following demyelination, hOPCs migrate effectively in both young and aged mice.** (A) Experimental outline. P2-4 Rag2<sup>-/-</sup> pups were injected with NRP1<sup>+/+</sup> or NRP1<sup>-/-</sup> cells. 1.5 years later, adult mice received an LPC lesion. Analysis was performed 1 week post lesion. (B) The percentage of NRP1<sup>+/+</sup> or NRP1<sup>-/-</sup> PDGFRα<sup>+</sup> hOPCs in the lesion is similar between young and old mice. Two-way ANOVA with Sidak's test. Young NRP1<sup>+/+</sup> n=3, Young NRP1<sup>-/-</sup> n=5, Old NRP1<sup>+/+</sup> and NRP1<sup>-/-</sup> n=4. Each point represents 1 mouse, and is the average quantification of 3 sections/mouse. Graph plots: means ± SEM.



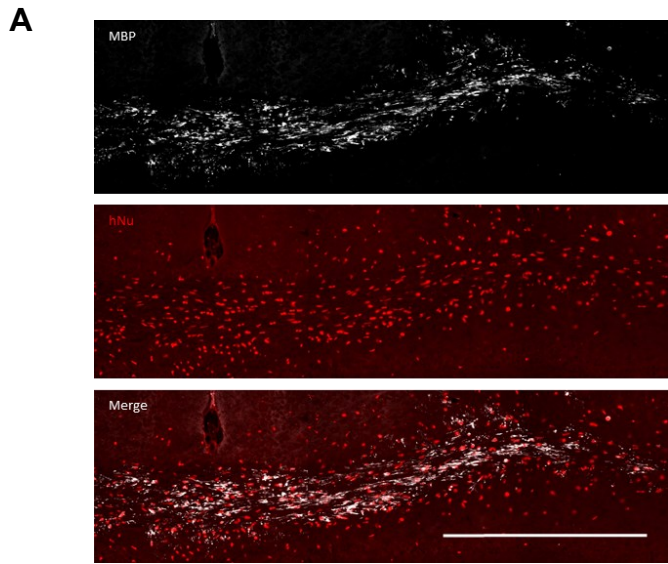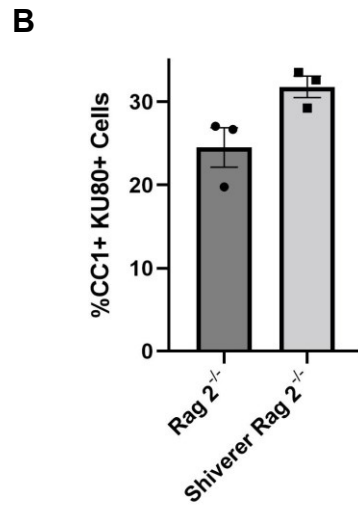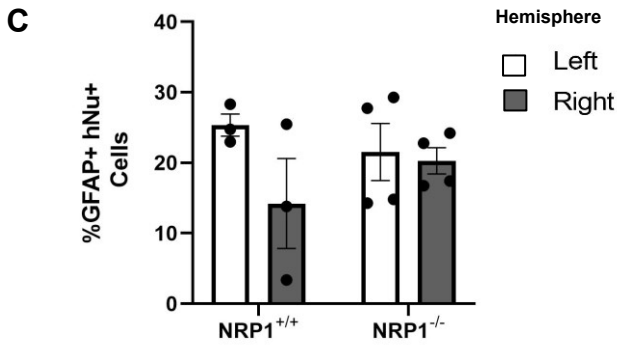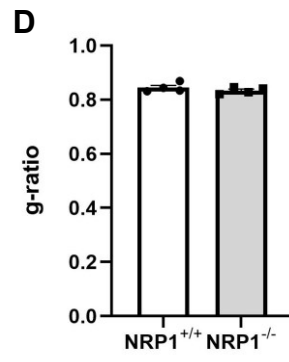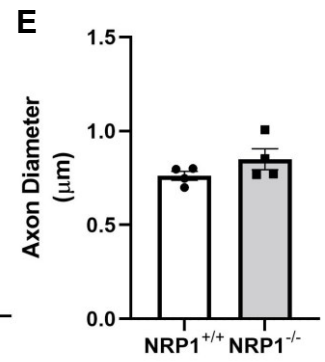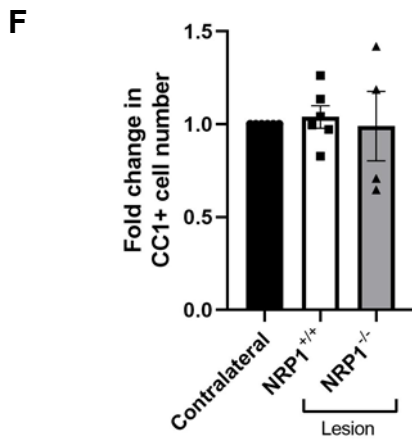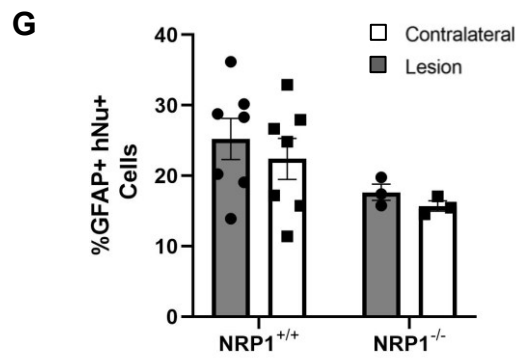

**Supplementary Figure 7: Analysis of human myelin in *Shiverer:Rag2<sup>-/-</sup>* mice (A)**

MBP+ human myelin in the corpus callosum 6 weeks post transplant. Scale bar = 500 $\mu$ m. (B) NRP1<sup>+/+</sup> and NRP1<sup>-/-</sup> cells generate equal numbers of GFAP+ astrocytes in uninjured *Shi/Shi:Rag2<sup>-/-</sup>* mice, that are evenly distributed in both hemispheres. n=3 NRP1<sup>+/+</sup> n=4 NRP1<sup>-/-</sup> for each condition, two-tailed unpaired t-test, p=0.1663 and p= 0.789. (C) Average g-ratios showing no difference in myelin thickness between NRP1<sup>+/+</sup> and NRP1<sup>-/-</sup> transplants. n=4 for each condition, unpaired two-tailed t-test, p=0.3586. (D) The average diameter of myelinated axons was not different between NRP1<sup>+/+</sup> and NRP1<sup>-/-</sup> transplants. n=4 for each condition, unpaired two-tailed t-test, p=0.1944. (E) 3 weeks post lesion, the number of CC1-positive human oligodendrocytes was equal between the uninjured contralateral and the lesion sites when either NRP1<sup>+/+</sup> (p=0.9399) or NRP1<sup>-/-</sup> (p=0.9969) cells were transplanted. n=6/4 respectively, one-way ANOVA, Tukey test. (F) NRP1<sup>+/+</sup> and NRP1<sup>-/-</sup> GFAP+ astrocyte numbers were similar between the lesion and the unlesioned contralateral side. n=7/3 respectively for each condition, two-tailed unpaired t-test, p=0.5034 and p=0.2269. For B,E,F: each point represents 1 mouse, and is the average quantification of 3 sections/mouse. For C,D: each point represents 1 mouse, and is the average quantification of ~100 axons per mouse. All graphs plot means  $\pm$  SEM.

**A**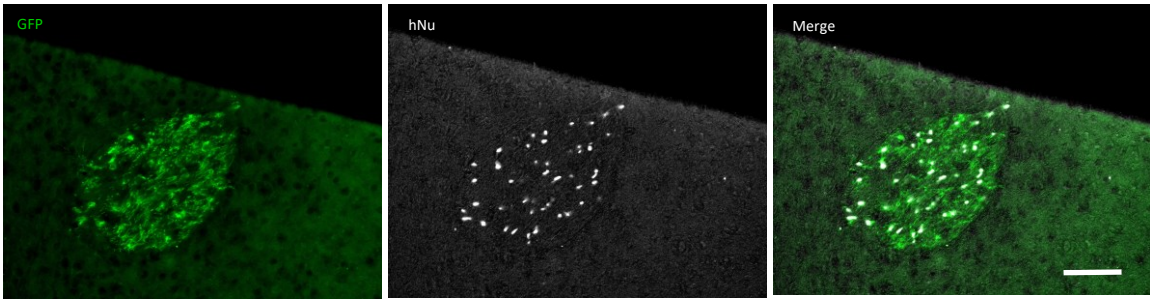**B**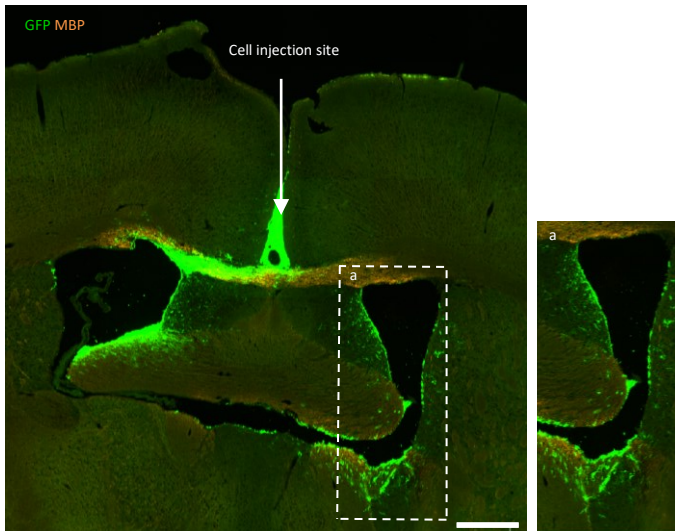

**Supplementary Figure 8: Transplanted cell distribution in the brain.** (A) Following long-term transplantation into the parenchyma, cells were even found in the anterior commissure. Scale bar 100 $\mu$ m (B) hOPCs injected into the cerebral spinal fluid (CSF) were highly migratory and found far away from the injection site. Scale bar 500 $\mu$ m. Representative images.

**A**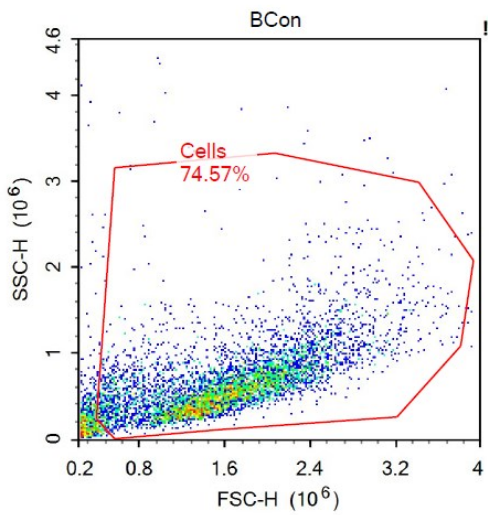**B**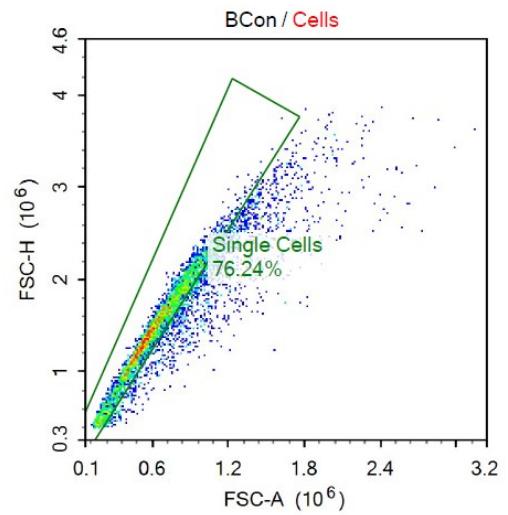**C**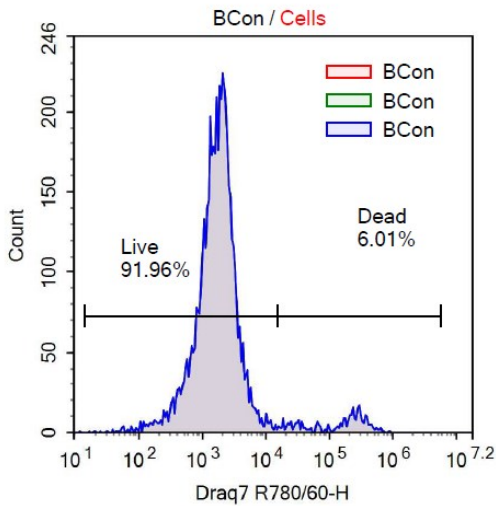

**Supplementary Figure 9: Gating strategy for live/dead flow cytometry.** Examples from sample B control (BCon). (A) Forward and side scatter gating to select all cells. (B) Forward scatter gating to select single cells. (C) Draq7 histogram determining live and dead cells.

**Supplemental Table 1: OPC differential expression.**

| Gene  | p_val    | avg_log2FC | pct.1 | pct.2 | p_val_adj |
|-------|----------|------------|-------|-------|-----------|
| CASK  | 9.95E-27 | -0.2543    | 0.806 | 0.894 | 2.97E-22  |
| MDK   | 5.05E-21 | -0.3059    | 0.242 | 0.429 | 1.51E-16  |
| USP34 | 2.16E-18 | 0.25446    | 0.514 | 0.327 | 6.44E-14  |
| ODC1  | 2.05E-17 | -0.26017   | 0.516 | 0.658 | 6.12E-13  |
| HMG2  | 2.13E-12 | -0.25683   | 0.607 | 0.726 | 6.34E-08  |

**Supplemental Table 2: Oligodendroglia differential expression.**

| Gene  | p_val    | avg_log2FC | pct.1 | pct.2 | p_val_adj |
|-------|----------|------------|-------|-------|-----------|
| CASK  | 1.69E-84 | -0.31517   | 0.688 | 0.817 | 5.04E-80  |
| MDK   | 6.38E-76 | -0.38219   | 0.333 | 0.552 | 1.90E-71  |
| MT3   | 1.84E-75 | -0.41041   | 0.282 | 0.476 | 5.48E-71  |
| USP34 | 1.31E-57 | 0.276567   | 0.522 | 0.314 | 3.90E-53  |
| ODC1  | 3.88E-53 | -0.28373   | 0.455 | 0.608 | 1.16E-48  |
| HOPX  | 7.81E-44 | -0.288     | 0.47  | 0.577 | 2.33E-39  |
| PTGDS | 1.44E-38 | 0.310825   | 0.322 | 0.169 | 4.30E-34  |

**Supplemental Table 3: Astrocytes differential expression.**

| Gene     | p_val     | avg_log2FC  | pct.1 | pct.2 | p_val_adj |
|----------|-----------|-------------|-------|-------|-----------|
| MT3      | 0         | -0.56292493 | 0.553 | 0.829 | 0         |
| NEAT1    | 6.11E-186 | -0.43388126 | 0.496 | 0.728 | 1.82E-181 |
| OTX2-AS1 | 4.04E-150 | 0.343190753 | 0.384 | 0.141 | 1.20E-145 |
| MDK      | 1.24E-135 | -0.33201636 | 0.627 | 0.804 | 3.69E-131 |
| S100A13  | 8.81E-113 | -0.30389208 | 0.193 | 0.39  | 2.63E-108 |
| USP34    | 2.41E-103 | 0.281297101 | 0.514 | 0.317 | 7.18E-99  |
| CASK     | 5.74E-98  | -0.25934495 | 0.616 | 0.75  | 1.71E-93  |
| NTRK2    | 1.66E-93  | 0.278744217 | 0.358 | 0.172 | 4.95E-89  |
| DCLK1    | 2.48E-93  | 0.268416088 | 0.77  | 0.619 | 7.39E-89  |
| PTGDS    | 2.94E-90  | 0.304468934 | 0.306 | 0.131 | 8.75E-86  |
| LGALS1   | 2.02E-74  | -0.27985847 | 0.354 | 0.513 | 6.03E-70  |
| EDNRB    | 1.77E-68  | -0.28779725 | 0.634 | 0.758 | 5.28E-64  |

**Supplemental Table 4: All cells differential expression.**

| Gene     | p_val     | avg_log2FC  | pct.1 | pct.2 | p_val_adj |
|----------|-----------|-------------|-------|-------|-----------|
| MT3      | 0         | -0.46542596 | 0.404 | 0.615 | 0         |
| OTX2-AS1 | 3.19E-202 | 0.278029875 | 0.264 | 0.091 | 9.52E-198 |
| CASK     | 1.12E-198 | -0.28886145 | 0.632 | 0.768 | 3.33E-194 |
| MDK      | 1.20E-188 | -0.32124218 | 0.468 | 0.636 | 3.59E-184 |
| USP34    | 3.39E-188 | 0.290112295 | 0.512 | 0.312 | 1.01E-183 |
| PTGDS    | 1.72E-134 | 0.278377612 | 0.273 | 0.124 | 5.12E-130 |
| NEAT1    | 1.32E-129 | -0.291891   | 0.408 | 0.551 | 3.93E-125 |

**Supplemental Table 5: Primary antibody information**

| <b>Antibody</b>                                    | <b>Source</b>        | <b>Identifier</b>           | <b>Dilution</b>                | <b>Application</b> |
|----------------------------------------------------|----------------------|-----------------------------|--------------------------------|--------------------|
| Rat monoclonal anti-MBP                            | Serotec              | MCA409S<br>RRID:AB_325004   | 1:250                          | IF                 |
| Rabbit polyclonal anti-Olig2                       | Millipore            | AB9610<br>RRID:AB_570666    | 1:400                          | IF                 |
| Goat polyclonal anti-Olig2                         | R&D Systems          | AF2418<br>RRID:AB_2157554   | 1:400                          | IF                 |
| Mouse monoclonal anti-Nuclei Antibody, clone 235-1 | Millipore            | MAB1281<br>RRID:AB_94090    | 1:400                          | IF                 |
| Mouse monoclonal anti-Oligodendrocyte Marker O4    | R&D Systems          | MAB1326<br>RRID:AB_357617   | 1:400                          | IF                 |
| Rabbit polyclonal anti-Ki67                        | Abcam                | ab15580<br>RRID:AB_443209   | 1:400                          | IF                 |
| Rabbit monoclonal anti-IBA1                        | Abcam                | ab178846<br>RRID:AB_2636859 | 1:400                          | IF                 |
| Rabbit monoclonal anti-PDGFRa                      | Cell signalling      | 3174<br>RRID:AB_2162345     | Tissue<br>1:400 cells<br>1:200 | IF                 |
| Rabbit monoclonal anti-KU80                        | Cell signalling      | 2180<br>RRID:AB_2218736     | 1:400                          | IF                 |
| Mouse monoclonal anti-APC (CC1)                    | Abcam                | ab16794<br>RRID:AB_443473   | 1:100                          | IF                 |
| Chicken anti-GFAP                                  | Cambridge Bioscience | 829401                      | 1:500                          | IF                 |
| Mouse monoclonal anti-beta actin                   | Sigma                | A2228<br>RRID:AB_476697     | 1:1000                         | WB                 |
| Rabbit monoclonal anti-NRP1                        | Abcam                | ab81321<br>RRID:AB_1640739  | 1:1000                         | WB                 |
| Sheep polyclonal anti-NRP1                         | R&D Systems          | AF3870<br>RRID:AB_884367    | 1:200                          | WB                 |
