# Supplementary material for: CRISPR-edited human ES-derived oligodendrocyte progenitor cells improve remyelination in rodents
Source: PubMed Central journal article supplement (PMC11464782; doi:10.1038/s41467-024-52444-w), 2024-10-09
Supplement: 41467_2024_52444_MOESM3_ESM.pdf [file 41467_2024_52444_MOESM3_ESM.pdf]

## Description of Additional Supplementary Files

**Supplementary Video 1:** Human oligodendrocyte myelination of mouse axons. A z-stack showing Human GFP<sup>+</sup> (green) oligodendrocytes generating MBP (red) 10 weeks after transplantation into Shi/Shi:Rag2<sup>-/-</sup> mice. Hoechst (blue). Corresponding still shown in Supplementary Figure 1 E.

**Supplementary Data 1:** Copy Number Variation The tab “all CNVs” contains the location, size and copy number value of all the CNVs detected with the SNP array in the NRP1<sup>+/+</sup> and NRP1<sup>-/-</sup> cells. In green are highlighted the CNVs that are identical between the two samples. The second tab contains the CNVs found in the NRP1<sup>-/-</sup> cells but absent in the NRP1<sup>+/+</sup>

**Supplementary Data 2:** CAS9 off-target predicted sequences
